# Supplementary material for: [Co(2,2′-bipy)3]Ag3I6with a hole structure facilitates dye adsorption and photocatalytic reduction
Source: Royal Society of Chemistry journal article supplement (doi:10.1039/d2dt03128k), 2022-01-01
Supplement: d2dt03128k1.pdf [file d2dt03128k1.pdf]

## Electronic Supplementary Information

### **[Co(2,2'-bipy)<sub>3</sub>]Ag<sub>3</sub>I<sub>6</sub> with hole structure facilitates dye adsorption and photocatalytic reduction**

Chunying Tang<sup>#a</sup>, Yawei Sun<sup>#a</sup>, Jianbiao Liu<sup>a</sup>, Qinfeng Xu<sup>\*b</sup>, Chun-yang Zhang<sup>\*a</sup>

<sup>a</sup> College of Chemistry, Chemical Engineering and Materials Science, Shandong Normal University, Jinan 250014, China

<sup>a</sup> School of Food and Biological Engineering, Shaanxi University of Science and Technology, Xi'an, 710021, China.

\* Corresponding author. Email: cyzhang@sdu.edu.cn; xuqinfeng@sust.edu.cn.

## Table of contents

|                                                                                                                                      |     |
|--------------------------------------------------------------------------------------------------------------------------------------|-----|
| Table S1. Selected bond lengths (Å) and angles (°) of compound <b>1</b> .....                                                        | S3  |
| Table S2. Hydrogen bond lengths (Å) and angles (°) of compound <b>1</b> .....                                                        | S4  |
| Table S3. Summary of structures of silver halogenides directed by transition metal cations and their photocatalytic properties ..... | S5  |
| Figures .....                                                                                                                        | S8  |
| Fig. S1 The photo of crystals of <b>1</b> .....                                                                                      | S8  |
| Fig. S2 Variance of UV-vis spectra with time for RhB in the presence of compound <b>1</b> .....                                      | S8  |
| Fig. S3 Simulated, after adsorption and after release powder XRD patterns of compound <b>1</b> .....                                 | S9  |
| Fig. S4 Experimental and simulated powder XRD patterns of compound <b>1</b> .....                                                    | S9  |
| Fig. S5 Variance of $\ln(C_0/C)$ value with reaction time for the degradation of RhB by compound <b>1</b> .....                      | S10 |
| .....                                                                                                                                | S10 |
| Fig. S6 Radical-trapping experiments for the degradation of RhB by compound <b>1</b> .....                                           | S10 |
| References.....                                                                                                                      | S11 |

**Table S1.** Selected bond lengths (Å) and angles (°) of compound **1**.

|                     |            |                     |            |
|---------------------|------------|---------------------|------------|
| Ag(1)–I(1)          | 2.9023(6)  | Ag(1)–I(2)          | 2.9305(6)  |
| Ag(1)–Ag(1)#1       | 3.3491(7)  | Co(1)–N(1)          | 1.927(4)   |
| Co(1)–N(2)          | 1.931(4)   |                     |            |
| I(1)–Ag(1)–I(1)#1   | 108.49(19) | I(1)–Ag(1)–I(1)#2   | 100.20(2)  |
| I(1)#1–Ag(1)–I(1)#2 | 109.26(19) | I(1)–Ag(1)–I(2)     | 114.40(2)  |
| I(1)#1–Ag(1)–I(2)   | 112.00(19) | I(1)#2–Ag(1)–I(2)   | 111.80(19) |
| Ag(1)–I(1)–Ag(1)#1  | 70.30(14)  | Ag(1)–I(1)–Ag(1)#2  | 113.93(2)  |
| Ag(1)–I(1)–Ag(1)#2  | 70.70(14)  | N(1)–Co(1)–N(1)#1   | 93.59(16)  |
| N(1)–Co(1)–N(1)#2   | 93.59(16)  | N(1)#1–Co(1)–N(1)#2 | 93.58(16)  |
| N(1)–Co(1)–N(2)     | 83.66(16)  | N(1)–Co(1)–N(2)#1   | 88.42(15)  |
| N(1)–Co(1)–N(2)#2   | 176.70(15) | N(1)#1–Co(1)–N(2)   | 176.70(15) |
| N(1)#2–Co(1)–N(2)   | 88.42(15)  | N(1)#1–Co(1)–N(2)#1 | 83.66(16)  |
| N(1)#1–Co(1)–N(2)#2 | 88.42(15)  | N(1)#2–Co(1)–N(2)#1 | 176.70(15) |
| N(1)#2–Co(1)–N(2)#2 | 83.66(16)  | N(2)#1–Co(1)–N(2)   | 94.42(16)  |
| N(2)#2–Co(1)–N(2)   | 94.42(16)  | N(2)#1–Co(1)–N(2)#2 | 94.42(16)  |

Symmetry transformations used to generate equivalent atoms: #1  $x-y+2/3, x+1/3, -z+1/3$ ; #2  $-y+1, x-y+1, z$ ; #3  $y-1/3, -x+y+1/3, -z+1/3$ ; #4  $-x+y, -x+1, z$ .

**Table S2.** Hydrogen bond lengths (Å) and angles (°) of compound **1**.

| D–H···A              | d(H···A) | d(D···A) | <(DHA) |
|----------------------|----------|----------|--------|
| C(1)–H(1)···N(1)#1   | 2.46     | 2.971(6) | 114.0  |
| C(2)–H(2)···I(2)     | 3.17     | 3.867(5) | 134.0  |
| C(4)–H(4)···I(1)     | 3.22     | 3.845(5) | 127.0  |
| C(4)–H(4)···I(2)     | 3.33     | 3.847(5) | 118.0  |
| C(10)–H(10)···N(2)#2 | 2.52     | 3.021(6) | 114.0  |

Symmetry transformations used to generate equivalent atoms: #1  $-y+1, x-y+1, z$ ; #2  $-x+y, -x+1, z$ ; #3  $-x+1, -y+1, -z+1$ ; #4  $x, y, z+1$ .

**Table S3.** Summary of structures of silver halogenides directed by transition metal cations and their photocatalytic properties.

| Compound formulae                                                                             | Anion structure                                                                     | Photocatalytic property                                                              | Ref |
|-----------------------------------------------------------------------------------------------|-------------------------------------------------------------------------------------|--------------------------------------------------------------------------------------|-----|
| [TM(phen) <sub>3</sub> ]Ag <sub>2</sub> I <sub>4</sub> ·3 DMF (TM = Co, Ni, Zn)               | 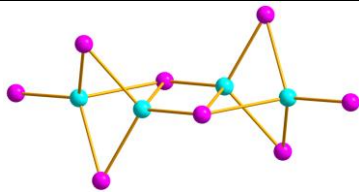   |    | 1   |
| [TM(phen) <sub>3</sub> ]Ag <sub>3</sub> I <sub>5</sub> ·D MF (TM = Co, Ni, Zn)                |    |    | 1   |
| [TM(phen) <sub>3</sub> ] <sub>2</sub> Ag <sub>8</sub> I <sub>12</sub> ·7DMF (TM = Co, Ni, Zn) |  |  | 1   |
| [Co(phen) <sub>3</sub> ](Ag <sub>3</sub> I <sub>5</sub> )·2CH <sub>3</sub> CN                 |  |  | 2   |
| [Cu(phen) <sub>2</sub> (Br)]AgB r <sub>2</sub>                                                |  |  | 3   |
| [Ni(DMSO) <sub>6</sub> ][Ag <sub>5</sub> I <sub>7</sub> ]                                     |  |  | 4   |

|                                                                                                                                |                                                                                     |                                                                                      |   |
|--------------------------------------------------------------------------------------------------------------------------------|-------------------------------------------------------------------------------------|--------------------------------------------------------------------------------------|---|
| [TM(2,2-bipy) <sub>3</sub> ]Ag <sub>3</sub> I <sub>5</sub> (TM = Mn, Fe, Co, Ni, Zn)                                           | 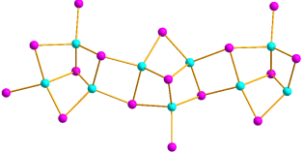   |    | 5 |
| [Fe(phen) <sub>2</sub> (Cl) <sub>2</sub> ] <sub>2</sub> Ag <sub>2</sub> Br <sub>4</sub>                                        |    |    | 3 |
| [M(phen) <sub>3</sub> ] <sub>2</sub> Ag <sub>11</sub> I <sub>15</sub> ·H <sub>2</sub> O (M = Co, Cu)                           |    |    | 2 |
| [V(DMSO) <sub>5</sub> (H <sub>2</sub> O)] [Ag <sub>6</sub> I <sub>8</sub> ]                                                    |   |   | 4 |
| K <sub>x</sub> [TM(2,2-bipy) <sub>3</sub> ] <sub>2</sub> Ag <sub>6</sub> I <sub>11</sub> (TM = Mn, Fe, Co, Ni, Zn; x = 0.89–1) |  |  | 6 |
| [(Ni(2,2-bipy) <sub>3</sub> )[H-2,2-bipy]Ag <sub>3</sub> I <sub>6</sub>                                                        |  |  | 6 |
| [TM(2,2-bipy) <sub>3</sub> ] <sub>2</sub> Ag <sub>13</sub> Br <sub>17</sub> (T M = Ni, Co, Zn, Fe)                             |  |  | 7 |

|                                                                                                                    |                                                                                    |                                                                                     |          |
|--------------------------------------------------------------------------------------------------------------------|------------------------------------------------------------------------------------|-------------------------------------------------------------------------------------|----------|
| <p><math>K[Co(2,2-</math><br/> <math>bipy)_3]_2Ag_6Br_{11}</math></p>                                              | 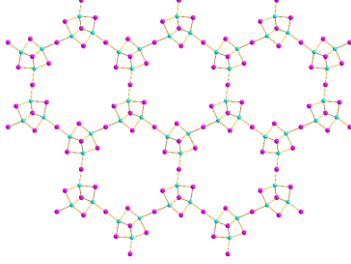  |   | <p>7</p> |
| <p><math>[M(phen)_3]_2Ag_{13}I_{17}</math><br/> (M = Co, Cd)</p>                                                   |   |   | <p>2</p> |
| <p><math>[TM(phen)_3]_2Ag_{13}Br</math><br/> <math>_{17} \cdot 2dmsO \cdot 3H_2O</math> (TM<br/> = Fe, Co, Ni)</p> |  |  | <p>3</p> |

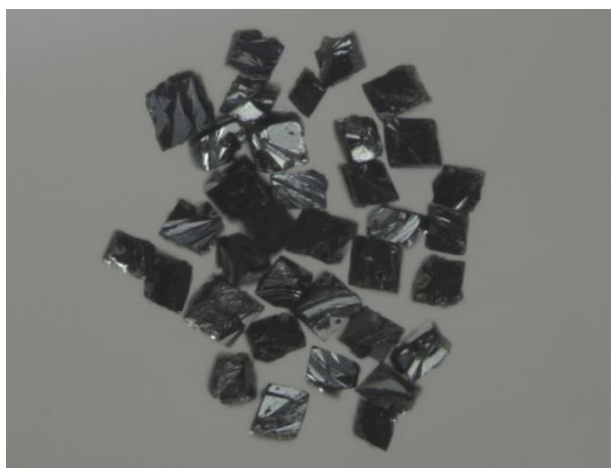

**Fig. S1** The photo of crystals of compound **1**.

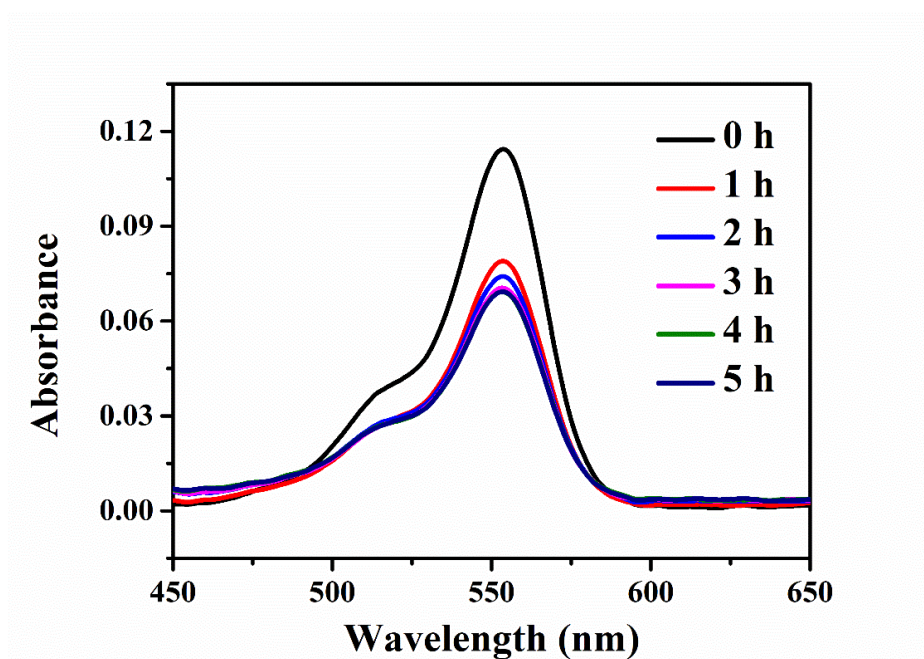

**Fig. S2** Variance of UV-vis spectra with time for RhB in the presence of compound **1**.



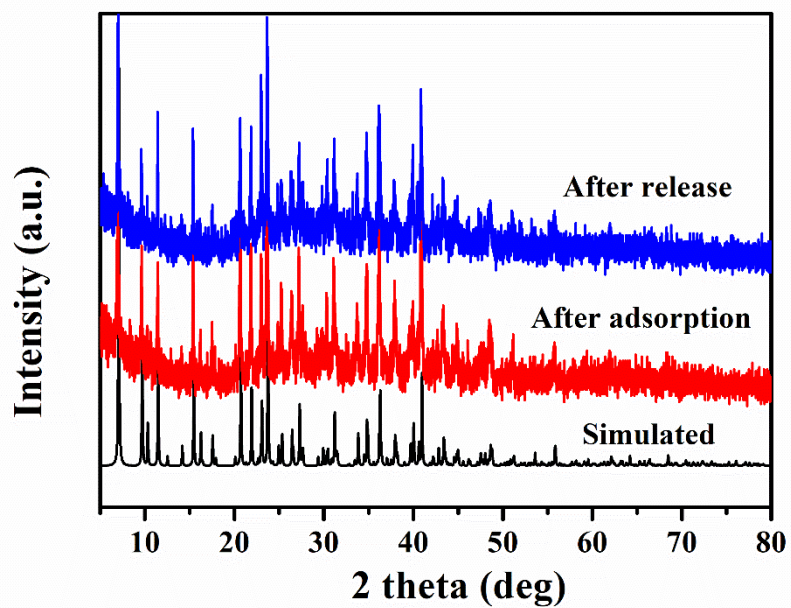

**Fig. S3** Simulated, after adsorption and after release powder XRD patterns of compound **1**.

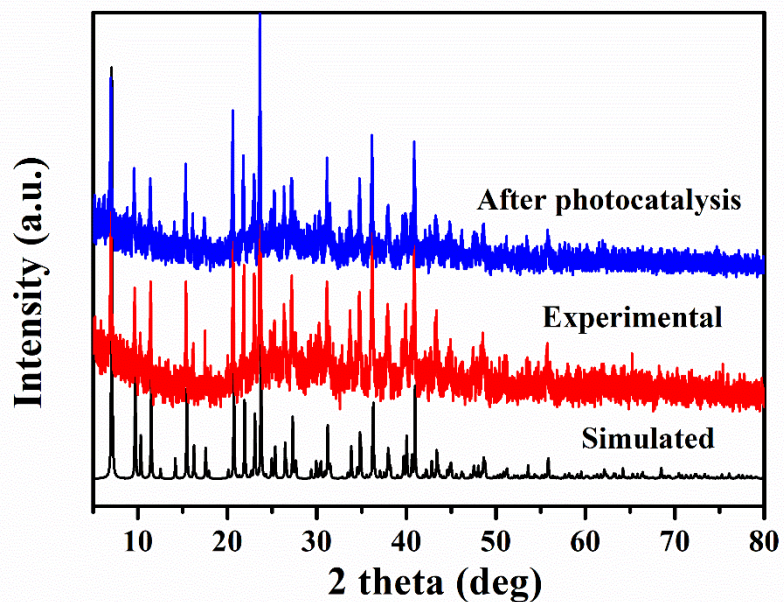

**Fig. S4** Experimental and simulated powder XRD patterns of compound **1**.

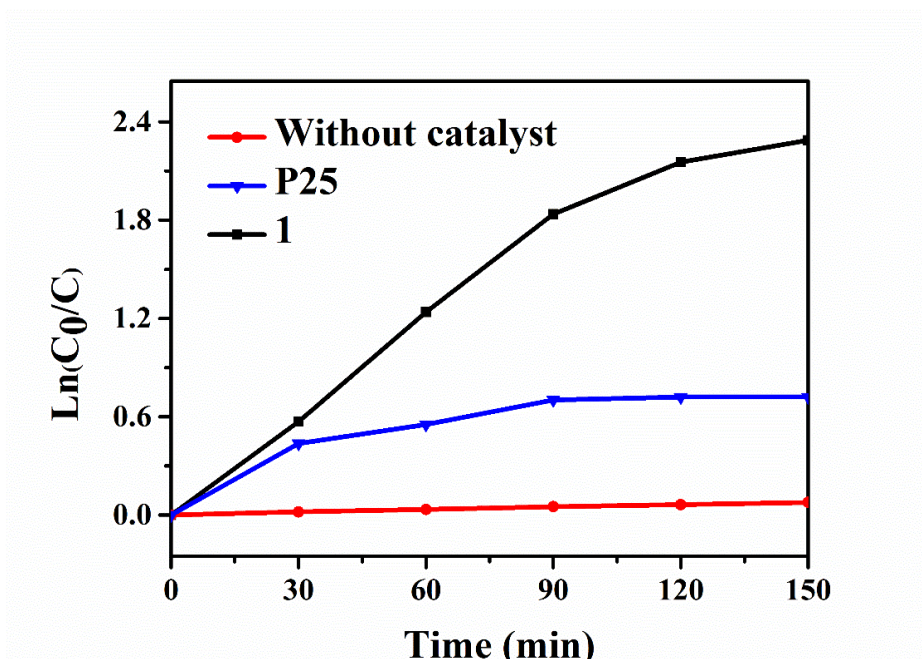

Fig. S5 Variance of  $\ln(C_0/C)$  value with reaction time for the degradation of RhB by compound 1.

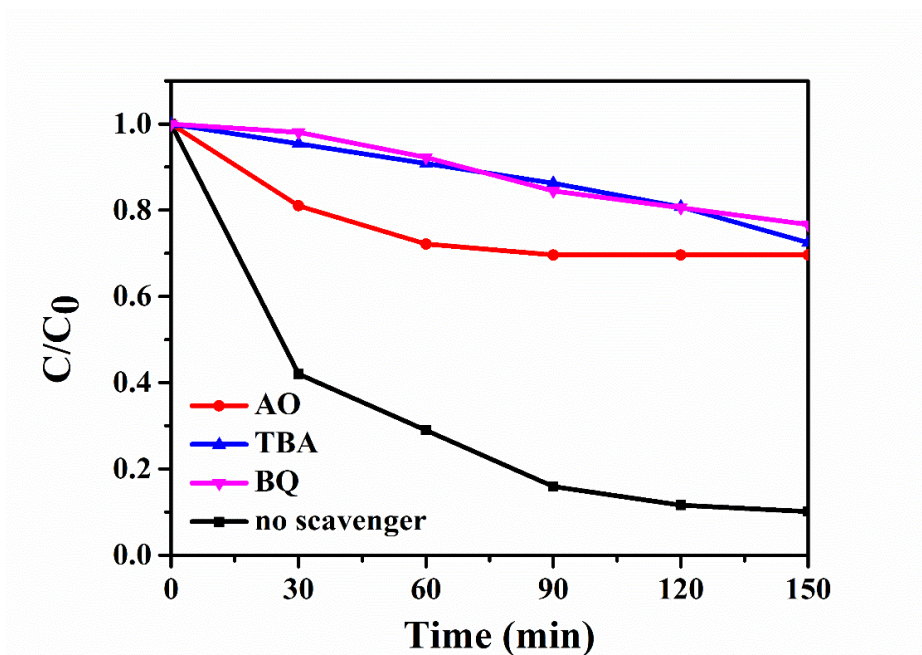

Fig. S6 Radical-trapping experiments for the degradation of RhB by compound 1.

## References

- 1 C. Tang, J. Yao, Y. Li, Z. Xia, J. Liu and C. Zhang, *Inorg. Chem.*, 2020, **59**, 13962–13971.
- 2 T. Yu, Y. Fu, Y. Wang, P. Hao, J. Shen and Y. Fu, *CrystEngComm*, 2015, **17**, 8752–8761.
- 3 Y. Shen, L. Zhang, S. Li, P. Sun, W. Jiang and D. Jia, *Eur. J. Inorg. Chem.*, 2018, **6**, 826–834.
- 4 Y. Mu, D. Wang, X. D. Meng, J. Pan, S. D. Han and Z. Z. Xue, *Cryst. Growth Des.*, 2020, **20**, 1130–1138.
- 5 X. W. Lei, C. Y. Yue, J. Q. Zhao, Y. F. Han, Z. R. Ba, C. Wang, X. Y. Liu, Y. P. Gong and X. Y. Liu, *Eur. J. Inorg. Chem.*, 2015, **26**, 4412–4419.
- 6 X. W. Lei, C. Y. Yue, J. Q. Zhao, Y. F. Han, J. T. Yang, R. R. Meng, C. S. Gao, H. Ding, C. Y. Wang, W. D. Chen and M. C. Hong, *Inorg. Chem.*, 2015, **54**, 10593–10603.
- 7 C. Y. Yue, X. W. Lei, Y. F. Han, X. X. Lu, Y. W. Tian, J. Xu, X. F. Liu and X. Xu, *Inorg. Chem.*, 2016, **55**, 12193–12203.
